# Supplementary material for: Hysterectomised women’s perceptions and experiences of the risks and benefits of opportunistic salpingectomy: A qualitative interview study
Source: Research Square preprint supplement (doi:10.21203/rs.3.rs-6210685/v1), 2025-04-22
Supplement: Supplementary file 1 [file aa974dcb186f72c2464d77f9.docx]

**Interview guide:**

**1. Introduction**

- Please start by introducing yourselves with your first name and if you feel comfortable, you can also share why you had your uterus removed.

For this discussion, we have intentionally included both women who were randomised in the HOPPSA study and those who declined participation.

**For those of you who chose to be randomised in the study:**

- Was it a difficult decision to participate in the study?
- Was there something specific that influenced your decision?
- Did you feel involved in the decision?

**For those of you who chose not to be randomised in the study:**

- What was the reason?
- Was there something specific that influenced your decision?

**Regarding the decision to remove or leave the the Fallopian tubes in place:**

- Was it a difficult decision?
- Did you feel involved in the decision?
- Was there something specific that was decisive in making your choice?

**2. Before the surgery**

- Did you receive information about the advantages of removing the Fallopian tubes during the hysterectomy?
- Did you receive information about the disadvantages of removing the Fallopian tubes?
- Did you feel the information provided was sufficient?
- If not, what did you feel was missing?

**3. Organs removed**

- Did you feel you knew which organs would be removed before the surgery?
- Or which organs might be removed depending on the randomisation in the study?

**4. After the surgery**

- Are you satisfied with the surgery?
- Have you experienced any complications related to the surgery?
- Would you have wanted more or less information about the research on removing healthy Fallopian tubes?
- Is there anything you regret or would have done differently if it were today?
- In some cases, the plan to remove healthy Fallopian tubes may not succeed due to surgical risks or complications. Did this happen to anyone here? If so, what are your reflections on that? For others, what are your thoughts on this?
- Conversely, sometimes the Fallopian tubes are removed despite the initial plan not to do so, if the gynaecologist notices something potentially pathological during surgery. Did this happen to anyone here? If so, what are your reflections on this? For others, what are your thoughts on this?
- What are your thoughts on removing healthy organs, in this case, the Fallopian tubes, to reduce the risk of ovarian cancer?

**5. Menopause**

- As menopause approaches, ovarian oestrogen production decreases, which can cause symptoms like irregular menstruation, hot flashes, vaginal dryness, mood changes, or sleep disturbances. What is your view on menopause?
- Has the surgery influenced your view of menopause in any way?

Today, we don't know if removing the Fallopian tubes might affect the ovaries and lead to earlier menopause—this remains unclear. But we know that earlier menopause may increase risks for cardiovascular disease and osteoporosis.

- What are your thoughts on this?

**6. Ovarian Cancer**

- Do you have any experience or knowledge about ovarian cancer, such as knowing someone who has had it?
- Has the surgery affected your thoughts on ovarian cancer, and if so, how?

Unless there is an increased genetic risk or family history of ovarian cancer, the lifetime risk for ovarian cancer in women is around 1%. Research suggests that removing the Fallopian tubes may slightly reduce this risk, though it is unclear by how much. For example, halving the risk would lower it from 1% to 0.5%.

- What are your thoughts on removing the Fallopian tubes to reduce the risk of ovarian cancer?
- Would the magnitude of risk reduction influence your decision?

**7. Lack of guidelines and ongoing research**

There are currently no general recommendations in Sweden on whether to remove the Fallopian tubes during hysterectomy. The HOPPSA study have the aim to examine the effects of opportunistic salpingectomy and to provide more knowledge to help women make informed decisions. The study is still ongoing.

- At some clinics, the Fallopian tubes are removed during a hysterectomy, while at others they are not. Do you have any reflections on this?
- Given the lack of general guidelines and clear research findings, do you trust that doctors know what is best in each case? What are your thoughts on this?
- If future research shows that removing the Fallopian tubes slightly increases the risk of earlier menopause and its associated risks, how do you think you would feel about the decision if you were awaiting surgery today?
- Conversely, if it turns out that removing the Fallopian tubes carries no such risks and only offers a small reduction in ovarian cancer risk, how would that influence your decision?
- Is there anything that would have helped you decide whether to remove the Fallopian tubes?

**8. Other**

- Are there any additional thoughts or feelings on the topic that haven’t been addressed today?
- What are your impressions of today’s focus group discussion?
- Did the discussions today give you anything you will take with you?
